# Supplementary material for: COVID‐19 and mental health among at‐risk university students: A prospective study into risk and protective factors
Source: PubMed Central journal article supplement — Int J Methods Psychiatr Res. 2021 Dec 21;31(1):e1901. doi: 10.1002/mpr.1901 (PMC8886289; doi:10.1002/mpr.1901), 2021-12-21

## Supplementary Materials Figures S2-S8 (including caption of Figure S1)

**Figure S1** Bootstrapped confidence region based on occasions when edges were estimated to be different from zero. The boxes display the number of occasions when each edge was estimated to be zero. This is based on 1,000 bootstrapped samples.

|                     |                                                                                             |
|---------------------|---------------------------------------------------------------------------------------------|
| AdaptCop            | adaptive coping as measured during the pandemic                                             |
| Age_at_created      | age at inclusion of the study                                                               |
| AUDIT_diff          | difference score (T2-T1) for alcohol use                                                    |
| contactfamily_post  | frequency of contact with family during the pandemic per day/week                           |
| contactfriends_post | frequency of contact with friends during the pandemic per day/week                          |
| Coronastress_total  | level of subjective COVID-related stress experienced during the pandemic                    |
| DA_diff             | difference score (T2-T1) for depression and generalized anxiety combined (aggregate score)  |
| emosupportnow       | level of experienced emotional support during the pandemic                                  |
| IntSTUDENT          | international student (yes/no)                                                              |
| ISI_diff            | difference score (T2-T1) for insomnia                                                       |
| Loneliness_diff     | difference score (T2-T1) for loneliness                                                     |
| MaladaptCo          | maladaptive coping as measured during the pandemic                                          |
| MaleorFemale        | Seks                                                                                        |
| modphysact_during   | frequency of moderate (max. 30 minutes) physical activities per week during the pandemic    |
| pre_DASTDrugs       | problematic drug use prior to the pandemic (T1)                                             |
| relax_during        | frequency of relaxing activities per week during the pandemic                               |
| SANX_diff           | difference score (T2-T1) for social anxiety and social avoidance combined (aggregate score) |
| SF_HEALTH_diff      | difference score (T2-T1) for subjective health                                              |
| SHS_diff            | difference score (T2-T1) for subjective happiness                                           |
| Stress_diff         | difference score (T2-T1) for subjective stress                                              |

### Figures S2-S8: Models estimated with more and less conservative hyperparameters

#### Legend for Figures S2-S8

Dashed edges represent negative associations, while solid edges represent positive associations. Edge width and saturation were scaled based on the maximum edge found in the network ( $r = .34$ ); thus, wider and brighter edges indicate stronger connections. A pre-defined algorithm (Spring) was used to define the layout, but nodes 15 and 16 were manually placed slightly lower to avoid unclear visualization.

|                        |                                                                   |
|------------------------|-------------------------------------------------------------------|
| Adaptive_Coping_during | adaptive coping (e.g., positive refocusing) during the pandemic   |
| Contact_Family_during  | frequency of contact with family during the pandemic per day/week |

|                           |                                                                                          |
|---------------------------|------------------------------------------------------------------------------------------|
| Contact_Friends_during    | frequency of contact with friends during the pandemic per day/week                       |
| COVID_Stress_during       | level of subjective COVID-related stress experienced during the pandemic                 |
| Drugs_pre                 | drug use prior to COVID-19 pandemic (T1)                                                 |
| Emotional_Support_during  | level of experienced emotional support during the pandemic                               |
| Maladaptive_Coping_during | maladaptive coping (e.g., rumination) during the pandemic                                |
| Physical_Activity_during  | frequency of moderate (max. 30 minutes) physical activities per week during the pandemic |
| Relax_Activity_during     | frequency of relaxing activities per week during the pandemic                            |

**Figure S2** Original network with tuning parameter = 0 (less conservative)

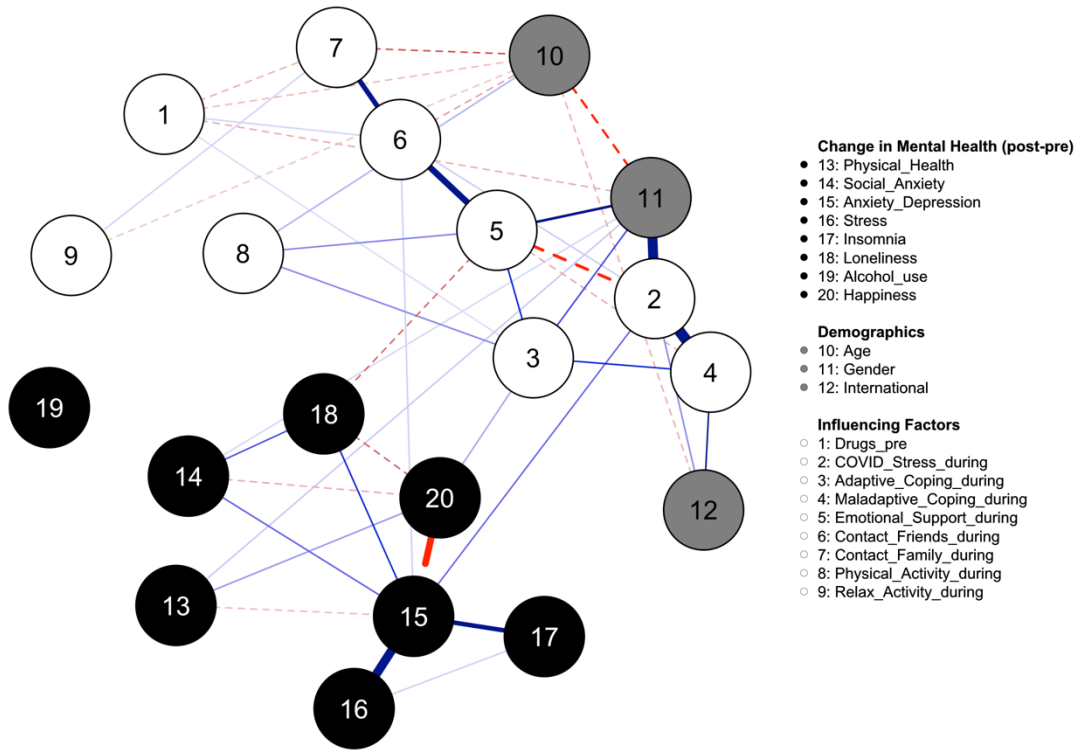

**Figure S3** Original network with tuning parameter = 0.5 (more conservative). Important: our edges of interest are retained with a more conservative network.

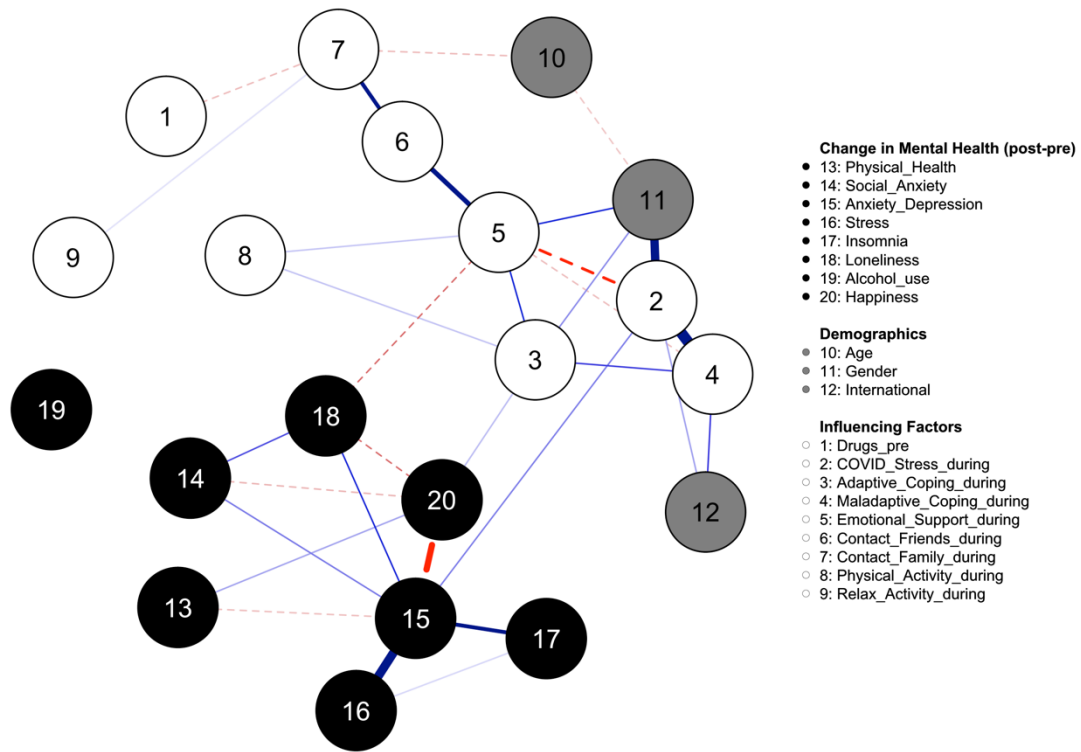

**Figure S4** Network excluding people with a longer period between the two measurements (tuning parameter = 0.25). There is no connection happiness-adaptive coping anymore, also there is a connection physical activity-insomnia.

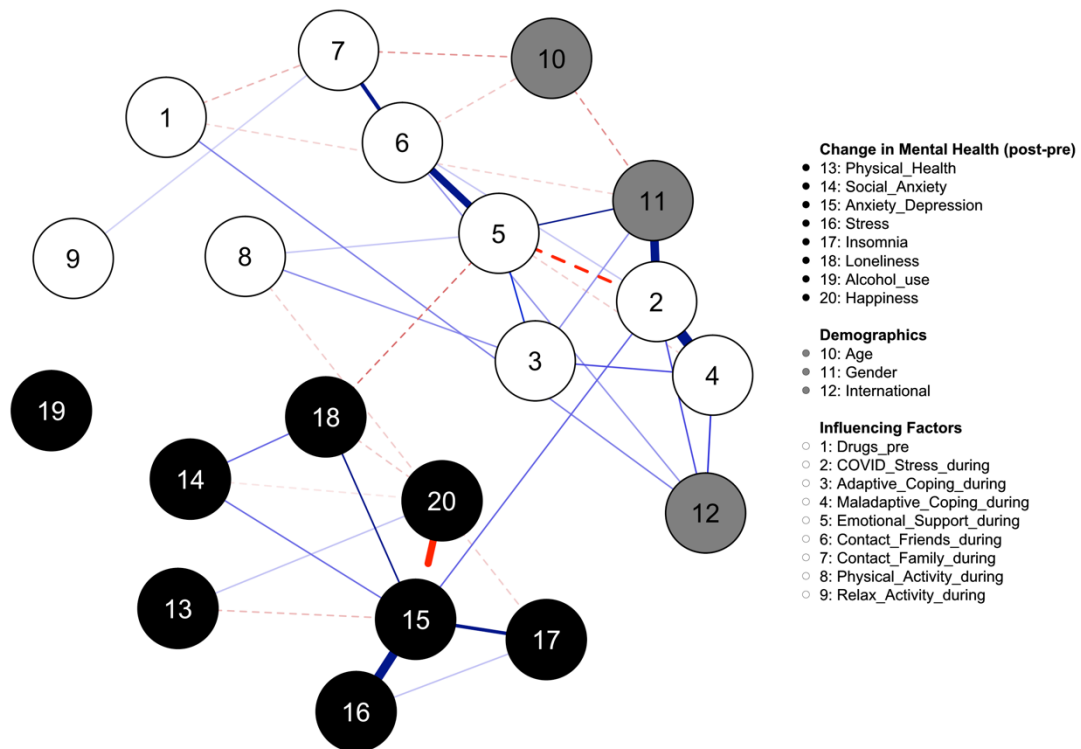

**Figure S5** Network excluding people with a longer period between the two measurements (tuning parameter = 0.5). There is no connection happiness-adaptive coping anymore.

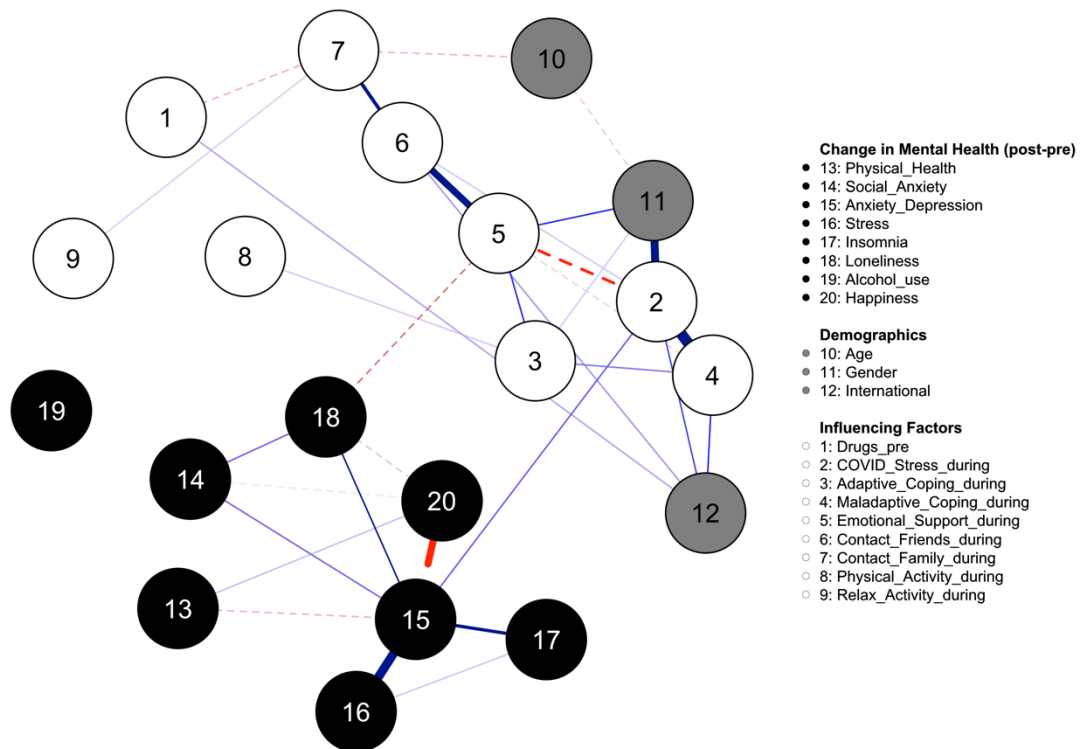

**Figure S6** Network excluding people with a longer period between the two measurements (tuning parameter = 0). The connection happiness-adaptive coping appears again. These differences in weaker connections between networks may be due to low power. So weaker connections (e.g., happiness-adaptive coping) can vary when we include less participants and when we use more conservative tuning parameters. The other connections of interest (e.g., loneliness-emotional support and COVID-19 stress-depression/anxiety) are robust across different networks.

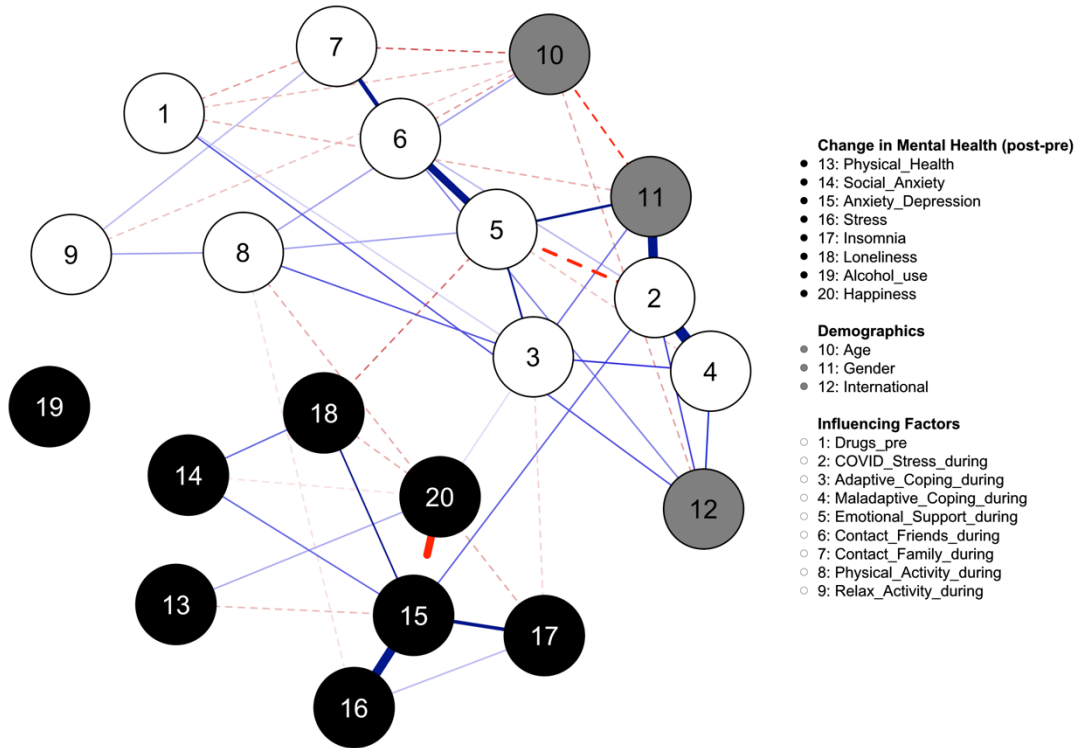

**Figure S7** Network with Anxiety instead of Anxiety/Depression (tuning parameter = 0.25). The network is similar to the original network in the main body of the paper. Robust connections (e.g., loneliness-emotional support and COVID-19 stress-anxiety) are the same. Here the connection happiness-adaptive coping is also still present.

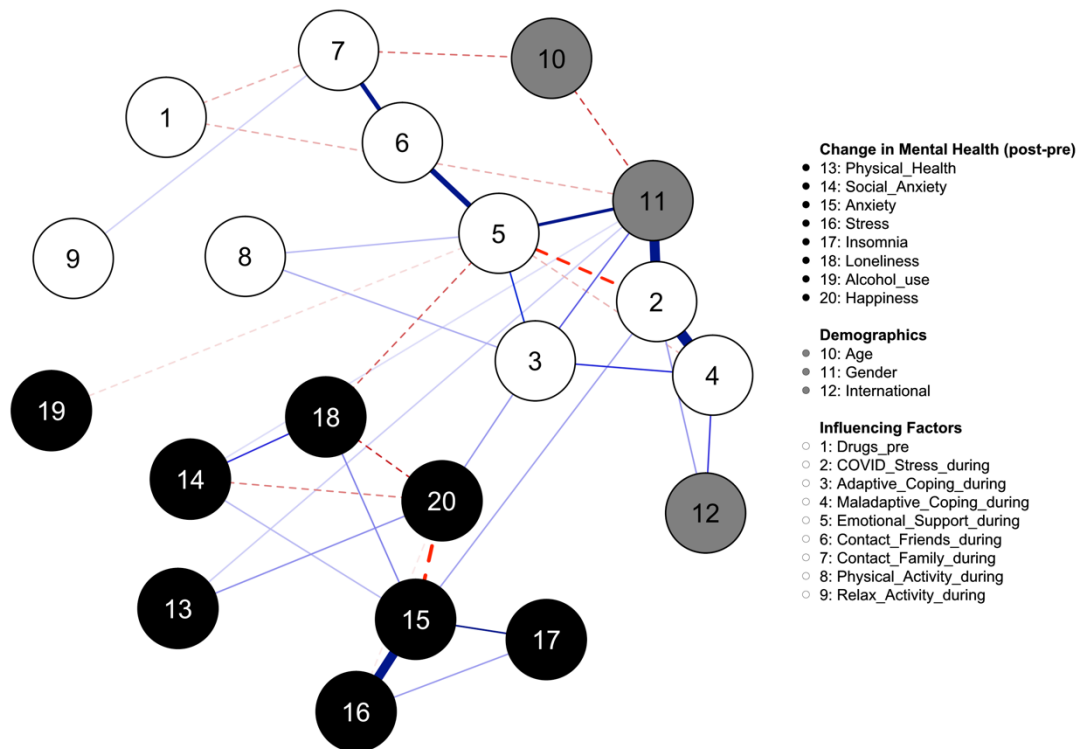



**Figure S8** Network with Depression instead of Anxiety/Depression (tuning parameter = 0.25). The network is similar to the original network in the main body of the paper. Robust connections (e.g., loneliness-emotional support and COVID-19 stress-depression) are the same. Here the connection happiness-adaptive coping is no longer present.

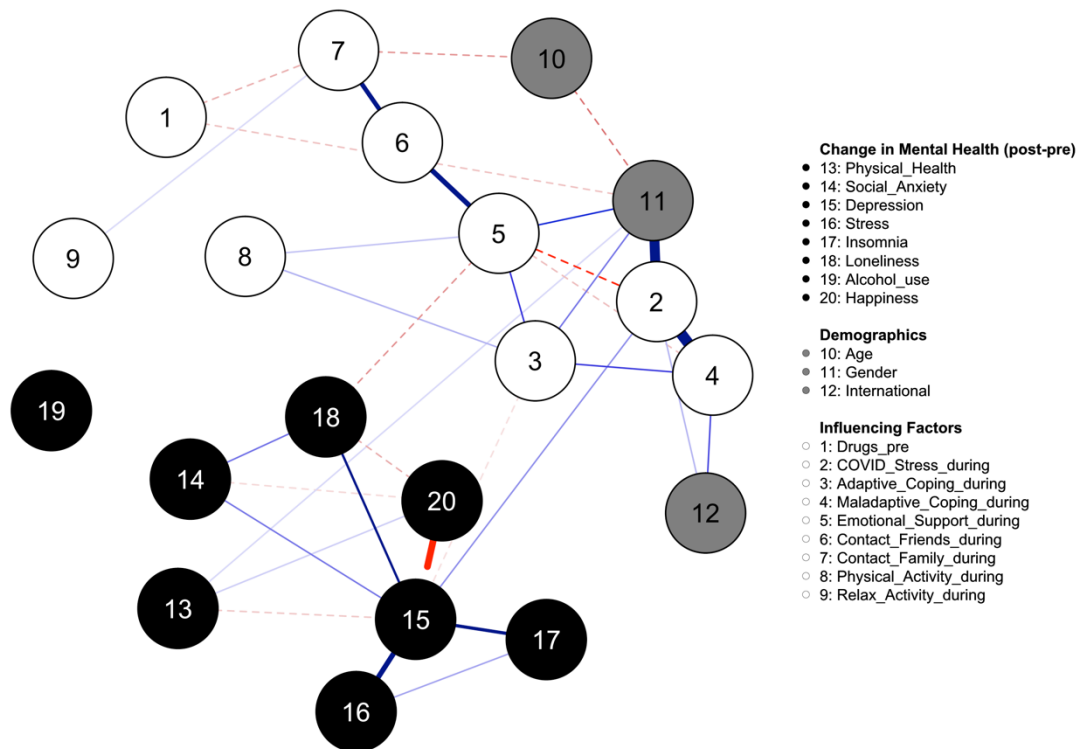

Supplement: MPR-31-e1901-s001.pdf [file MPR-31-e1901-s001.pdf]
