# Supplementary figures and images for: COVID‐19 and mental health among at‐risk university students: A prospective study into risk and protective factors
Source: PubMed Central journal article supplement — Int J Methods Psychiatr Res. 2021 Dec 21;31(1):e1901. doi: 10.1002/mpr.1901 (PMC8886289; doi:10.1002/mpr.1901), 2021-12-21

● Bootstrap mean ● Sample

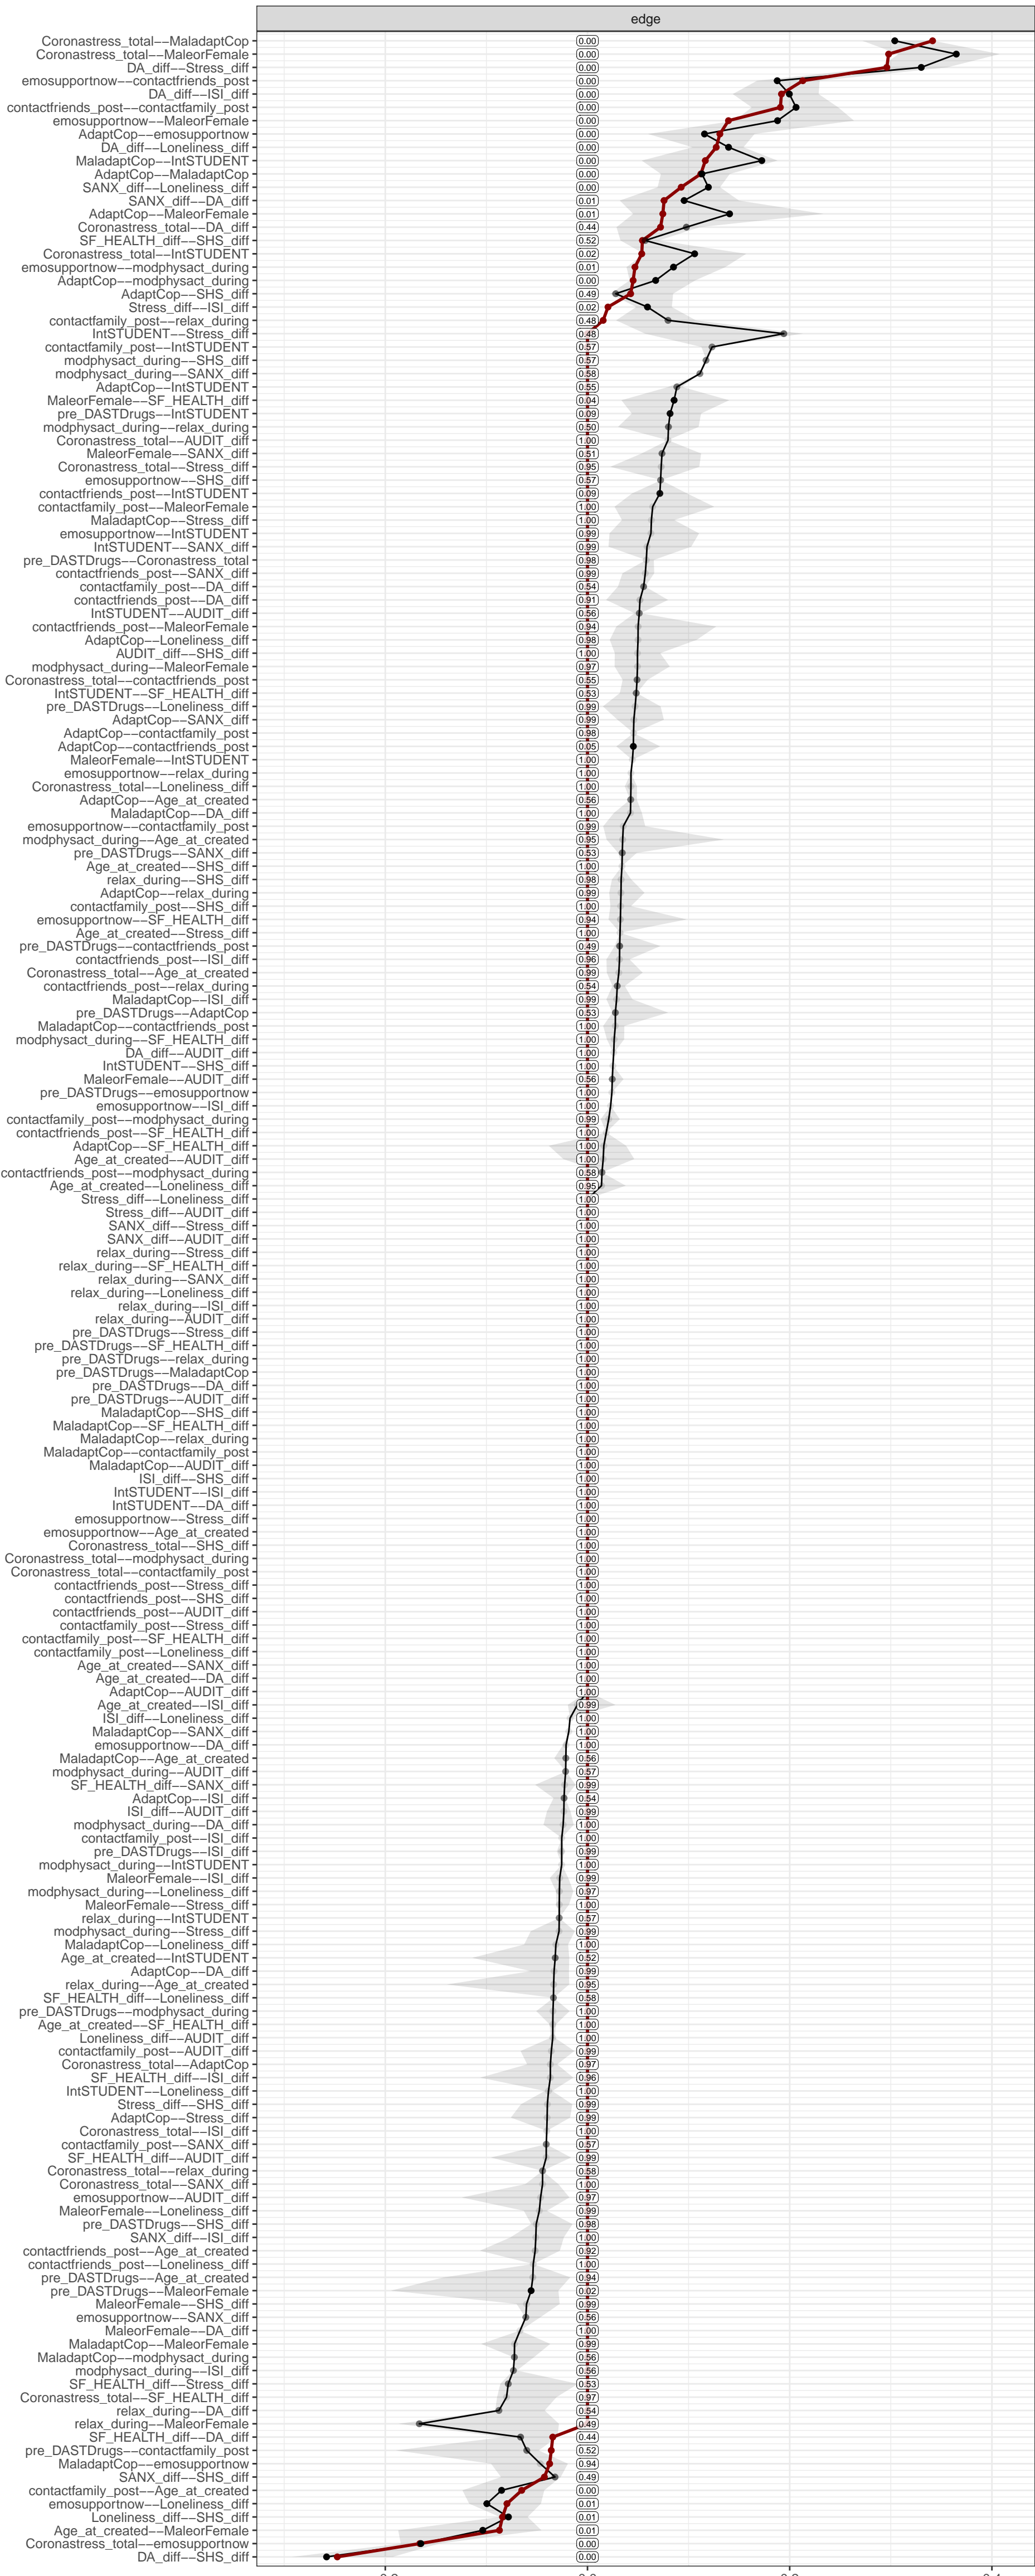

Supplement: MPR-31-e1901-s003.pdf [file MPR-31-e1901-s003.pdf]
